# Supplementary material
Source: publisher site journal article supplement (https://www.dovepress.com/article/305979)
Supplement: Supplementary file 1 [file get_supplementary_file.php]

**Supplementary Materials**

**Figure S1.** Spanish clips (same country) used in Hazard Prediction Test

|  | **Nº** | **Sec.** | **Last Photogram** | **Road** | **Description** | **Precursor** |
| --- | --- | --- | --- | --- | --- | --- |
| **CLIPS OF HAZARD PERCEPTION ( SPAIN)** | 1 | 30s | 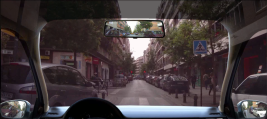 | Urban | A motorbike appears on the left | Blind bend |
| 2 | 30s | 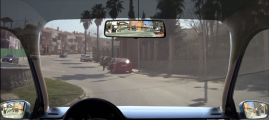 | Urban | The door of the red car on the right opens | Person walking towards the red car on the right |
| 3 | 23s | 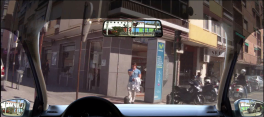 | Urban | A motorcycle on the left enters your lane | Motorcycle flashing indicator |
| 4 | 17s | 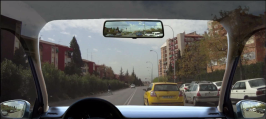 | Urban | A pedestrian on the right crosses the road | The same pedestrian appeared between the bushes before |
| 5 | 21s | 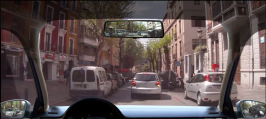 | Urban | A silver car stops and tries to park | Rear lights of the silver car |
| 6 | 36s | 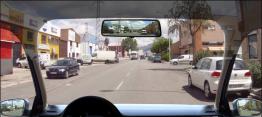 | Suburban | A white van tries to enter your lane from the right | The white van suddenly appears |
| 7 | 28s | 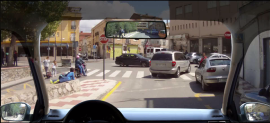 | Urban | Pedestrian on the right | Pedestrian visible between the parked cars |
| 8 | 33s | 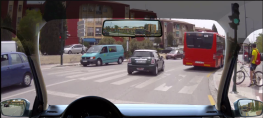 | Urban | Bus entering your lane | Bus flashing indicator |
| 9 | 18s | 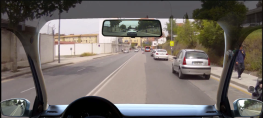 | Urban | Motorcyclist overtakes on the right | Sighting in the right-hand rear-view mirror |
| 10 | 28s | 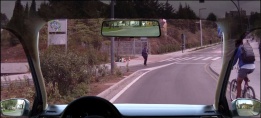 | Urban | Pedestrian on the left | The pedestrian is looking at the car |

**Figure S2.** English clips (different country) used in Hazard Prediction Test

|  | **Nº** | **Sec.** | **Last photogram** | **Road** | **Description of the risky situation** | |
| --- | --- | --- | --- | --- | --- | --- |
| **HAZARD PERCEPTION CLIPS (UNITED KINGDOM)** | 1 | 21s | 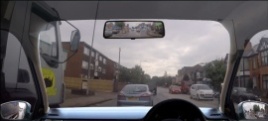 | Suburban | The lorry on the left overtakes | Lorry on the left |
| 2 | 35s | 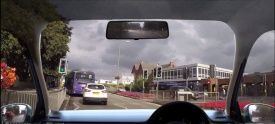 | Urban | The car ahead brakes sharply | Brake lights of the car |
| 3 | 44s | 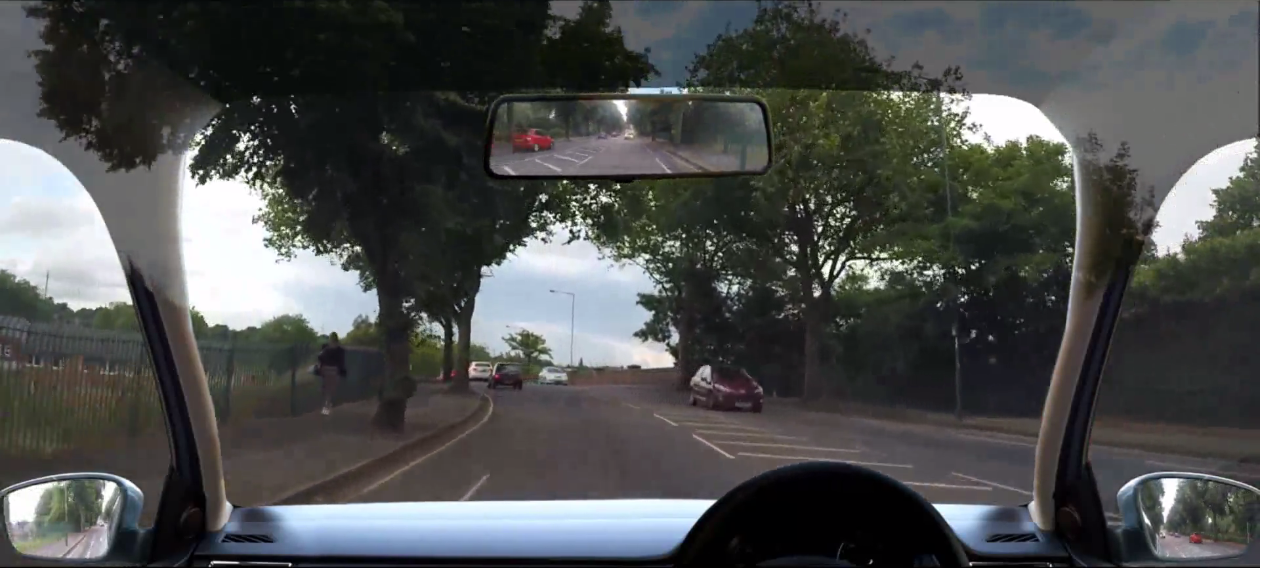 | Urban | A line of cars stops ahead | Brake lights of the car |
| 4 | 27s | 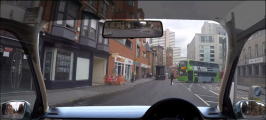 | Urban | A policeman is in the middle of the road | Blind bend |
| 5 | 38s | 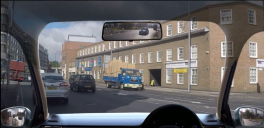 | Urban | The car ahead meets an obstacle | Indicator of the car flashing |
| 6 | 11s | 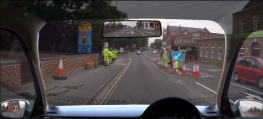 | Urban | Pedestrians on the right | The road-worker signals with his hand that you must stop |
| 7 | 48s | 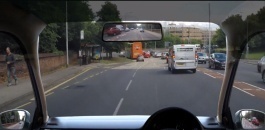 | Urban | The van on the right enters your lane | Abrupt movement of the van |
| 8 | 22s | 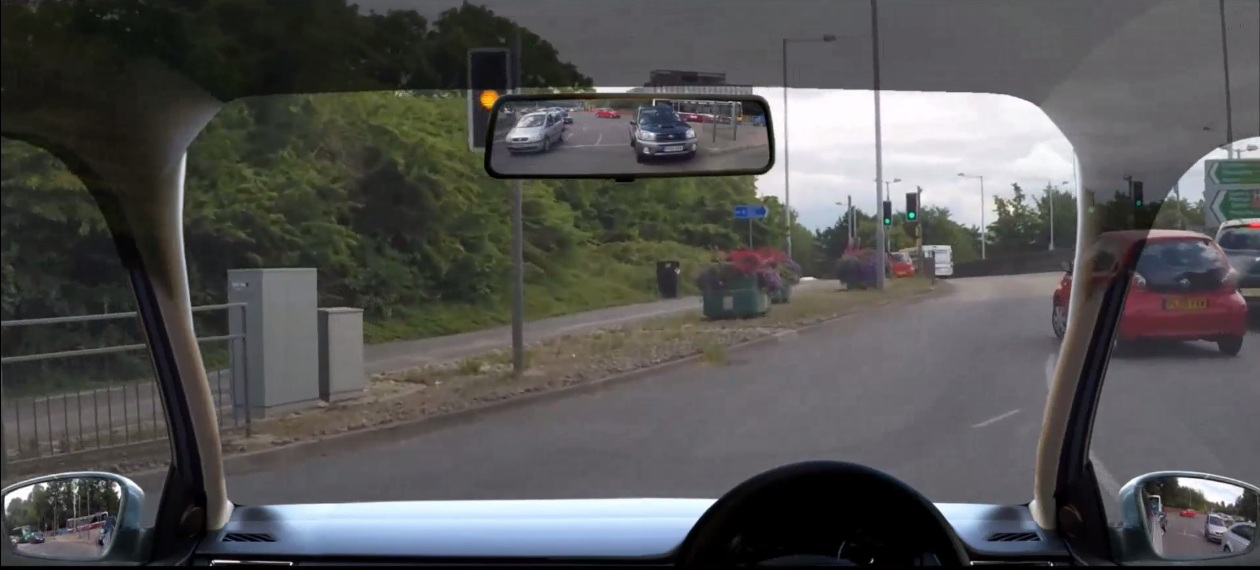 | Suburban | The red car on the right enters our lane | Abrupt movement of the red car |
|  | 9 | 48s | 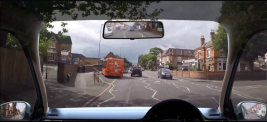 | Urban | A bus enters our lane | Brake lights of the car in front |
| 10 | 44s | 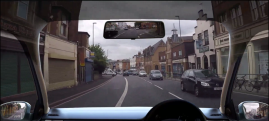 | Urban | A van on the left enters my lane | The stationary van on the left begins to move |

**Figure S3.** Spanish clips used in Risky Decision-Making Test

|  | **Nº** | **Sec.** | **Last photogram** | **Road** | **Description of the risky situation** |
| --- | --- | --- | --- | --- | --- |
| **CLIPS OF RDM (SPAIN)** | 1 | 28s | 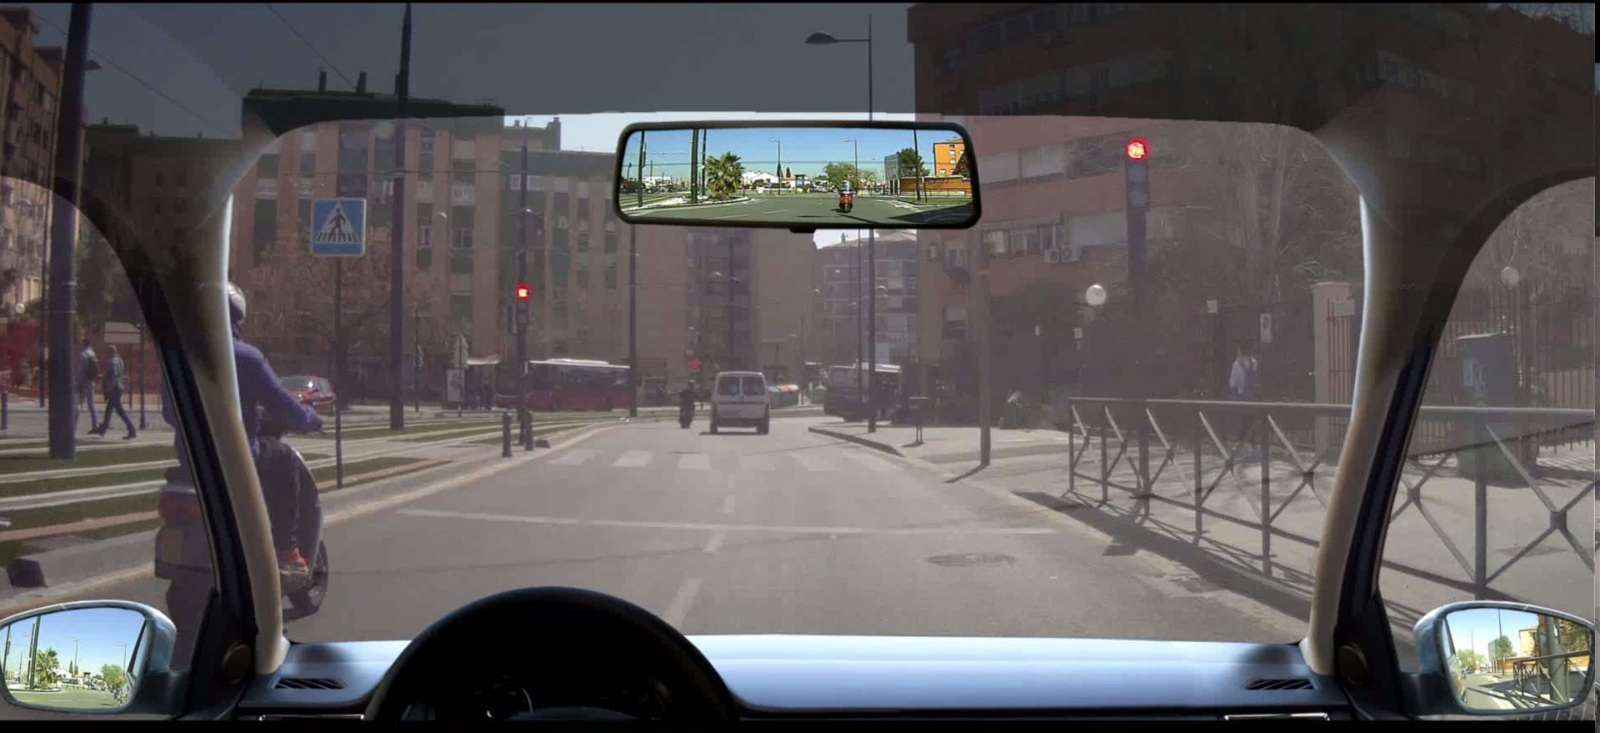 | Urban  Traffic Lights | You are exiting a roundabout and are faced with traffic lights on amber. The lights turn to red. Would you go ahead with the lights on red? |
| 2 | 27s | 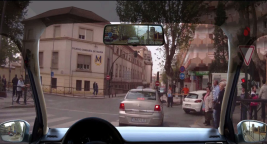 | Urban  Traffic Lights | You are approaching a red traffic light on a dual carriageway. The lights turn to red. Would you go ahead with the lights on red? |
| 3 | 27s | 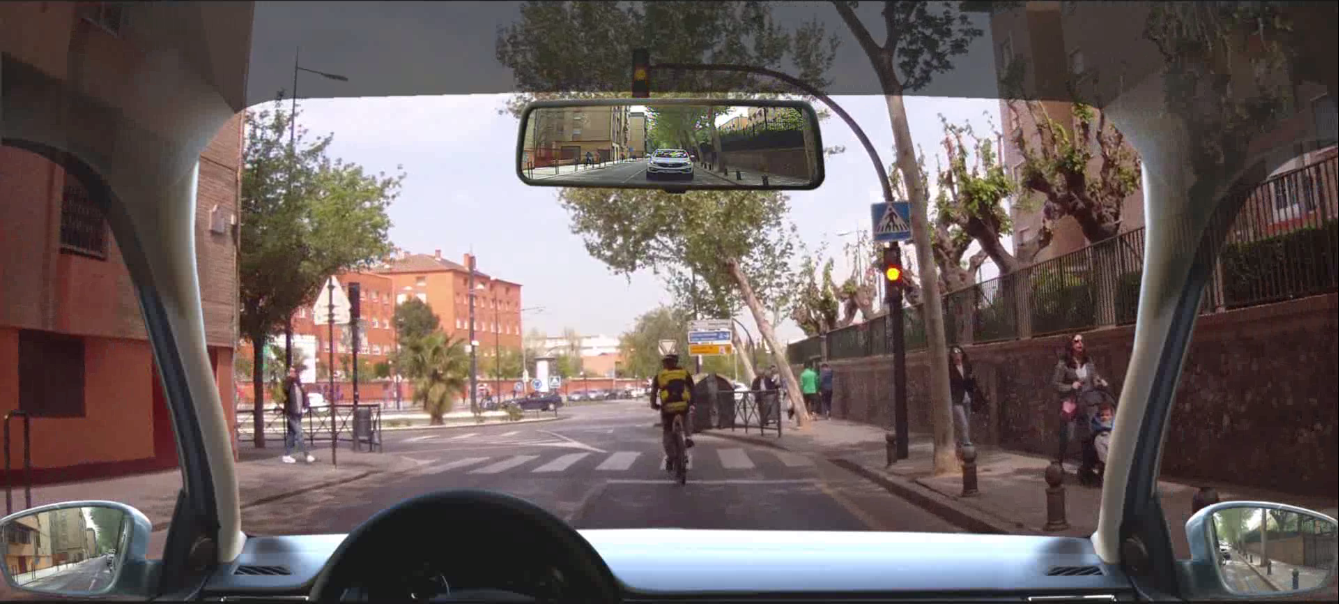 | Urban  Traffic  Lights | You are driving behind a cyclist. You reach some traffic lights. The lights turn to amber. Would you go ahead with the lights on amber? |
| 4 | 21s | 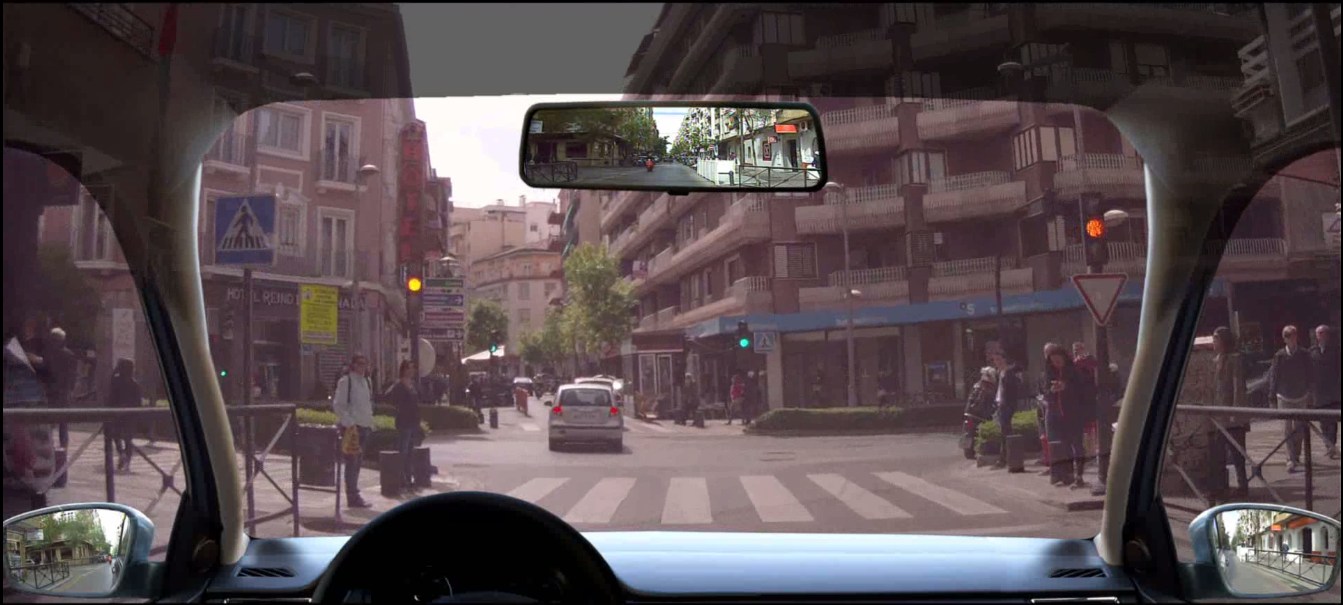 | Urban  Traffic  Lights | You are following a vehicle on a one-way road. The traffic lights turn to amber. Would you go ahead with the lights on amber? |
| 5 | 18s | 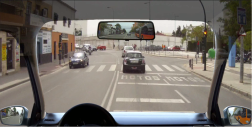 | Urban  Traffic lights | You are overtaking a bus and approaching some traffic lights. The lights turn amber. Would you go ahead with the lights on amber? |
| 6 | 20s | 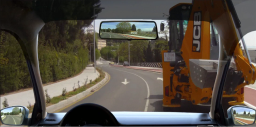 | Suburban  Overtaking the machinery | You are driving behind heavy machinery that is moving very slowly on a lane marked with a continuous white line. A vehicle is approaching from the opposite direction. Would you overtake the machinery at this point? |
| 7 | 19s | 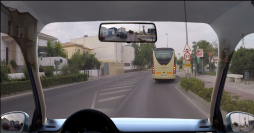 | Suburban  Overtaking a bus | You encounter a bus parked at its bus stop, occupying our lane in a zone where it is forbidden to overtake. Would you overtake the bus at this point? |
| 8 | 20s | 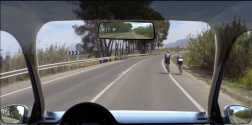 | Suburban  Overtaking the cyclists | After a bend, you encounter some cyclists. Another vehicle is coming towards us, approaching rapidly.  Would you overtake the cyclists at this point? |
| 9 | 23s | 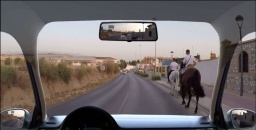 | Suburban  Overtaking the horses | You encounter some horse-riders who are blocking your lane while other cars are approaching from the opposite direction. Would you overtake the horses at this point? |
| 10 | 26s | 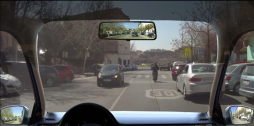 | Urban  Overtaking a car | You encounter a parked vehicle on your lane and another vehicle is coming towards us. Would you overtake the vehicle at this point? |

**Figure S4.** UK clips used in Risky Decision-Making Test

|  | **Nº** | **Sec.** | **Last photogram** | **Road/** | **Description of the risky situation** |
| --- | --- | --- | --- | --- | --- |
| **CLIPS OF RDM (UK)** | 1 | 37s | 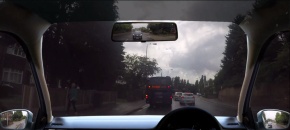 | Suburban  Overtaking a bus | You encounter a bus that has stopped and the car in front of you overtakes the bus on a continuous white line; another vehicle is coming towards you. Would you overtake the bus at this point? |
| 2 | 16s | 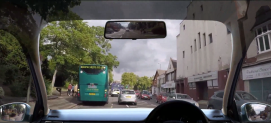 | Suburban  Overtaking a bus | You encounter a bus that has stopped and the car in front of you overtakes the bus on a continuous white line; another vehicle is coming towards us. Would you overtake the bus at this point? |
| 3 | 21s | 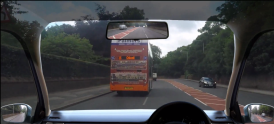 | Suburban  Overtaking a bus | You are driving on one of two lanes of a dual carriageway. Suddenly the road narrows to merge into one lane, which is occupied by a stopped bus. Would you overtake the bus at this point? |
| 4 | 26s | 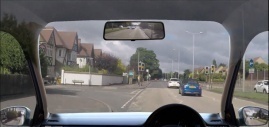 | Urban  Traffic Lights | You are driving behind a vehicle. The traffic lights turn to amber. Would you go ahead with the lights on amber? |
| 5 | 39s | 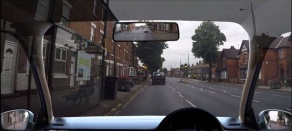 | Urban  Traffic Lights | You are driving along a road and approaching traffic lights that were on green but they turn to amber. Would you go ahead with the lights on amber? |
| 6 | 47s | 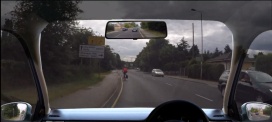 | Urban  Overtaking a cyclist | You encounter a cyclist who is occupying part of your lane while vehicles are approaching from the other direction.  Would you overtake the cyclist at this point? |
| 7 | 17s | 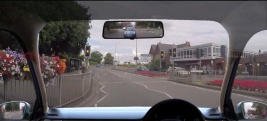 | Urban  Traffic Lights | You are approaching traffic lights that are on red. The lights turn amber. There is an elderly person intending to cross.  Would you go ahead with the lights on amber? |
| 8 | 32s | 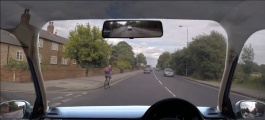 | Suburban  Overtaking  A cyclist | You encounter a cyclist who is occupying our lane while vehicles are approaching from the other direction.  Would you overtake the cyclist at this point? |
| 9 | 8s | 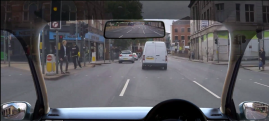 | Urban  Traffic  Lights | You encounter pedestrians who want to cross, on both sides of the road, while a traffic light turns to amber. Would you go ahead with the lights on amber? |
| 10 | 15s | 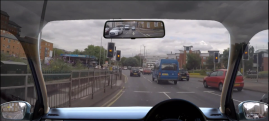 | Urban  Traffic Lights | You encounter pedestrians who want to cross, while a traffic light turns to amber. Would you go ahead with the lights on amber? |
